# Supplementary material for: Analysis of Proton Radiation-induced Effects on Polymer-based Relative Humidity Sensor
Source: Research Square preprint supplement (doi:10.21203/rs.3.rs-3125649/v1), 2023-07-14
Supplement: Supplementary file 1 [file 5deee130139093fd5d6fea27.pdf]

**Data availability**

The datasets used and analysed during the study are available from the corresponding author upon reasonable request.
